# Supplementary material for: Regulation of soybean drought response by mepiquat chloride pretreatment
Source: Front Plant Sci. 2023 May 8;14:1149114. doi: 10.3389/fpls.2023.1149114 (PMC10207941; doi:10.3389/fpls.2023.1149114)
Supplement: Supplementary file 4 [file Table_4.xlsx]

## Sheet: Sheet1
Index	Formula	Compounds	Class I	Class II	CAS	Level	HN65Drought-1	HN65Drought-2	HN65Drought0-3	HN65Drought+DPC-1	HN65Drought+DPC-2	HN65Drought+DPC-3	VIP	p_value	FDR	Fold_Change	Log2FC	Type
pmf0256	C6H14O	3-Methyl-1-pentanol	Others	Saccharides and Alcohols	589-35-5	3	34985	43749	43485	47304	116470	104920	1.23428	0.147641	0.384496	2.19846	1.1365	up
pme0006	C5H9NO2	L-Proline	Amino acids and derivatives	Amino acids and derivatives	147-85-3	1	7211700	3947100	3336800	8148700	16390000	15231000	1.33765	0.0637749	0.30009	2.74357	1.45605	up
pme3193	C4H7NO3	N-Acetyl-L-glycine	Amino acids and derivatives	Amino acids and derivatives	543-24-8	3	17921	15490	14004	22971	53981	42289	1.35661	0.115702	0.353214	2.51484	1.33046	up
mws0256	C5H11NO2	L-Valine	Amino acids and derivatives	Amino acids and derivatives	72-18-4	1	3238200	2318600	2248400	5084500	6624800	6479600	1.50479	0.00654994	0.266601	2.33036	1.22055	up
pmp001287	C8H9N	N-Benzylmethylene isomethylamine	Alkaloids	Alkaloids	-	1	5007600	5190200	5571700	10623000	14246000	12064000	1.56223	0.0194888	0.268413	2.34205	1.22777	up
pma0134	C4H8O4	D-(-)-Threose	Others	Saccharides and Alcohols	95-43-2	3	114730	88835	95033	63023	29197	37010	1.40194	0.0136841	0.266601	0.432789	-1.20826	down
MWSmce706	C5H8N2O2	Cyclo(Ala-Gly)	Amino acids and derivatives	Amino acids and derivatives	4526-77-6	2	587330	639290	918240	383640	157130	189620	1.39715	0.0241362	0.276246	0.34053	-1.55414	down
pma3649	C5H9NO3	5-Aminolevulinate	Alkaloids	Alkaloids	106-60-5	3	522190	496850	320380	885250	1324800	980240	1.44622	0.0274995	0.276246	2.38184	1.25208	up
pme0274	C6H13NO2	6-Aminocaproic acid	Organic acids	Organic acids	60-32-2	2	168900	158540	132330	274360	451830	352160	1.48325	0.051349	0.285325	2.34541	1.22984	up
mws0258	C6H13NO2	L-Isoleucine	Amino acids and derivatives	Amino acids and derivatives	73-32-5	1	2980600	2654100	2353600	4657400	7483600	6022100	1.48685	0.0474907	0.285325	2.27371	1.18505	up
mws1587	C6H13NO2	L-Norleucine	Amino acids and derivatives	Amino acids and derivatives	327-57-1	1	3105100	2623100	2514800	4969400	7474000	5767300	1.50458	0.0394603	0.285325	2.20923	1.14354	up
mws0227	C6H13NO2	L-Leucine	Amino acids and derivatives	Amino acids and derivatives	61-90-5	1	2774700	2582800	2352400	4790100	7060800	5516700	1.52233	0.03693	0.285325	2.25264	1.17161	up
mws0972	C6H12O3	6-Hydroxyhexanoic acid	Organic acids	Organic acids	1191-25-9	2	31649	42645	46469	13048	20805	19471	1.45031	0.0200272	0.268413	0.441559	-1.17932	down
Zmdp000972	C4H9NO2S	S-Methyl-L-cysteine	Amino acids and derivatives	Amino acids and derivatives	1187-84-4	2	269950	247200	257830	571280	1032300	621610	1.49999	0.0800895	0.322412	2.87129	1.5217	up
HJKP000649	C8H9NO	N-benzylformamide	Alkaloids	Alkaloids	6343-54-0	2	226700	218160	267840	565930	919560	612350	1.52965	0.0507486	0.285325	2.94351	1.55754	up
pme1173	C5H4N4O	Allopurinol	Nucleotides and derivatives	Nucleotides and derivatives	315-30-0	3	18378	19518	17720	71951	91576	90063	1.5844	0.00864766	0.266601	4.55966	2.18893	up
MWSmce466	C8H8O2	4-Hydroxyacetophenone	Phenolic acids	Phenolic acids	99-93-4	3	593920	153510	215410	150520	56191	130390	1.10262	0.266654	0.484708	0.350111	-1.51412	down
mws0146	C7H7NO2	Nicotinic Acid Methyl Ester(Methyl Nicotinate)	Alkaloids	Pyridine alkaloids	93-60-7	2	238130	312750	199880	356590	595640	670840	1.34413	0.0786459	0.322412	2.1619	1.1123	up
Lmgn000224	C5H6O5	2-Methyl-3-oxosuccinic acid	Organic acids	Organic acids	-	3	32364	62283	19381	75154	235970	113200	1.28295	0.159793	0.398252	3.72123	1.89578	up
pme2380	C5H6O5	α-Ketoglutaric acid	Organic acids	Organic acids	328-50-7	3	701180	841440	414640	896990	3237600	1607300	1.19435	0.207252	0.436909	2.93364	1.55269	up
pma0675	C8H8O3	o-Anisic acid	Phenolic acids	Phenolic acids	579-75-9	3	24623	21196	23418	9	9	17386	1.16955	0.0923127	0.341588	0.251368	-1.99212	down
mws1346	C6H11NO4	DL-2-Aminoadipic acid	Alkaloids	Alkaloids	542-32-5	2	857660	786120	756670	1855100	2301100	2527500	1.56227	0.0168296	0.266601	2.78435	1.47734	up
MWS5238	C10H12O2	4-PHENYLBUTYRIC ACID	Organic acids	Organic acids	1821-12-1	2	346020	379580	364160	110930	126190	124060	1.58976	0.000233279	0.0854577	0.331431	-1.59322	down
MWS4525	C6H7N5O	6-O-methylguanine	Nucleotides and derivatives	Nucleotides and derivatives	20535-83-5	1	414140	342310	636290	279650	72737	106520	1.29203	0.0517865	0.285325	0.329499	-1.60165	down
pme3968	C6H7N5O	7-Methylguanine	Nucleotides and derivatives	Nucleotides and derivatives	578-76-7	1	232510	162880	293460	158130	40291	57402	1.24932	0.0519238	0.285325	0.371377	-1.42904	down
pme0021	C9H11NO2	L-Phenylalanine	Amino acids and derivatives	Amino acids and derivatives	63-91-2	1	5975200	6272800	6297200	11952000	16614000	14250000	1.55411	0.0259922	0.276246	2.30874	1.2071	up
pmc0274	C6H6N4S	6-Methylmercaptopurine	Nucleotides and derivatives	Nucleotides and derivatives	50-66-8	3	27833000	28981000	29630000	52234000	68001000	59511000	1.56071	0.0196677	0.268413	2.07933	1.05612	up
Hmtp000776	C8H9NO3	4,5,6-Trihydroxy-2-cyclohexen-1-ylideneacetonitrile	Alkaloids	Alkaloids	-	3	648060	734980	667820	1337700	1936000	1597900	1.5416	0.029912	0.276246	2.37539	1.24817	up
MWS2417	C8H8O4	3-Hydroxymandelate	Organic acids	Organic acids	17119-15-2	2	10300	6911.3	9	9	9	9	1.14905	0.198915	0.430892	0.00156792	-9.31694	down
pme0253	C8H15NO3	N-Acetyl-L-leucine	Amino acids and derivatives	Amino acids and derivatives	1188-21-2	3	95123	101290	94388	124940	266640	242970	1.32786	0.120064	0.358561	2.18208	1.1257	up
mws0242	C8H14O4	Suberic Acid	Organic acids	Organic acids	505-48-6	2	190850	198380	212800	34229	90220	68678	1.4399	0.00713937	0.266601	0.320793	-1.64029	down
MWSmce690	C6H8O6	Erythorbic acid	Others	Vitamin	89-65-6	1	369680	336230	349760	206660	116190	154990	1.47549	0.0104776	0.266601	0.452641	-1.14356	down
Zmsp000878	C9H11NO3	4-hydroxy-5-(2-oxo-l-pyrrolidinyl)-benzoic Acid	Alkaloids	Pyrrole alkaloids	-	1	3569400	3432200	4196500	8151600	12976000	9105400	1.52696	0.0469019	0.285325	2.69983	1.43287	up
mws0250	C9H11NO3	L-Tyrosine	Amino acids and derivatives	Amino acids and derivatives	60-18-4	1	13735000	13195000	16897000	28020000	40761000	31248000	1.52103	0.0306048	0.277973	2.28236	1.19053	up
MWS5206	C9H10O4	Hydroxyphenyllactic acid	Phenolic acids	Phenolic acids	306-23-0	3	18316	18862	25083	28949	54803	44694	1.36828	0.0893953	0.341588	2.06303	1.04476	up
pmb2640	C12H24O2	Dodecanoic acid (Lauric acid)	Lipids	Free fatty acids	143-07-7	1	473610	369900	450330	2591500	1667400	948900	1.45851	0.110461	0.35183	4.02507	2.00901	up
pme0266	C10H18O4	Sebacate	Organic acids	Organic acids	111-20-6	1	6456.6	5952.6	7825.2	1287.8	2062.9	3067.4	1.46333	0.0038356	0.266601	0.317188	-1.65659	down
pme1261	C9H19NO4	D-Panthenol	Others	Saccharides and Alcohols	81-13-0	1	1260000	531190	395480	324950	143040	333780	1.17722	0.223697	0.454538	0.366663	-1.44748	down
Zmpn000199	C6H10O8	D-Galactaric acid	Others	Saccharides and Alcohols	526-99-8	1	1340400	1469300	2372600	1216700	436110	636030	1.2376	0.0800158	0.322412	0.441665	-1.17898	down
Zmyn000108	C6H10O8	D-Saccharic acid	Others	Saccharides and Alcohols	87-73-0	1	1189100	1462800	2041500	1130600	463110	552830	1.26185	0.06223	0.29996	0.457353	-1.12862	down
mws4174	C8H15NO6	N-Acetyl-D-mannosamine*	Others	Saccharides and Alcohols	7772-94-3	3	355530	317220	320300	181330	144090	167510	1.56085	0.000569261	0.125124	0.49638	-1.01048	down
mws5042	C11H14N2O3	L-Glycyl-L-phenylalanine	Amino acids and derivatives	Amino acids and derivatives	721-66-4	2	210740	184760	176930	325800	510670	378510	1.48628	0.0556546	0.292031	2.1225	1.08576	up
pmb0962	C10H22N2O4	L-Lysine-Butanoic Acid	Amino acids and derivatives	Amino acids and derivatives	80407-71-2	3	74842	43317	52947	168270	300610	269050	1.513	0.0360051	0.285325	4.31271	2.10859	up
mws1383	C12H10N4O2	Lumichrome	Alkaloids	Alkaloids	1086-80-2	2	41727	61358	164890	43804	16855	23644	1.14796	0.247391	0.470671	0.314593	-1.66844	down
Zmdp001647	C10H18N2O5	γ-Glutamyl-L-valine	Amino acids and derivatives	Amino acids and derivatives	-	1	115350	101260	100390	360590	604900	476390	1.56034	0.0331104	0.282026	4.54852	2.1854	up
pme2776	C10H12N4O4	2'-Deoxyinosine	Nucleotides and derivatives	Nucleotides and derivatives	890-38-0	2	43005	32733	62932	32928	15746	19016	1.23482	0.0985975	0.34913	0.488137	-1.03464	down
mws0040	C15H10O4	Chrysin	Flavonoids	Flavones	480-40-0	2	10342	8980.2	7134.6	40615	40748	8669.4	1.12006	0.184556	0.41734	3.403	1.76681	up
Zmdp002216	C11H20N2O5	L-γ-Glutamyl-L-leucine	Amino acids and derivatives	Amino acids and derivatives	2566-39-4	1	309650	425040	408760	771050	1167600	873020	1.50772	0.0337838	0.282026	2.45894	1.29803	up
MWS4309	C13H15N3O3	Glycyl-tryptophan	Amino acids and derivatives	Amino acids and derivatives	2390-74-1	3	68826	54808	53302	116820	207340	174930	1.4914	0.0514426	0.285325	2.82074	1.49607	up
Lmhp001732	C14H18N2O3	L-Prolyl-L-Phenylalanine	Amino acids and derivatives	Amino acids and derivatives	13589-02-1	3	138960	75009	77739	325340	646870	426900	1.49742	0.0542515	0.292031	4.79627	2.26191	up
mws1662	C16H12O4	Tectochrysin	Flavonoids	Flavones	520-28-5	2	8963.6	8487.3	4356.7	14386	21672	7640.6	1.03583	0.20621	0.436909	2.00382	1.00276	up
pme1119	C10H12N4O5	Inosine	Nucleotides and derivatives	Nucleotides and derivatives	58-63-9	3	89435	95204	82230	302860	221390	202550	1.54434	0.0363354	0.285325	2.72343	1.44543	up
mws1060	C10H12N4O5	9-(Arabinosyl)hypoxanthine	Nucleotides and derivatives	Nucleotides and derivatives	7013-16-3	2	392180	360910	330520	1436200	1702300	1401300	1.58483	0.00540758	0.266601	4.18951	2.06678	up
pme1712	C11H20N2O6	L-Saccharopine	Amino acids and derivatives	Amino acids and derivatives	997-68-2	3	334350	162110	113970	524420	851830	770700	1.40298	0.0165627	0.266601	3.51711	1.81439	up
Zmzp005934	C18H37NO	Stearamide	Alkaloids	Alkaloids	124-26-5	2	11529	8008	8925.3	14973	21328	25020	1.42458	0.051667	0.285325	2.15446	1.10733	up
pmp000416	C16H12O5	3'-Methoxydaidzein	Flavonoids	Isoflavones	21913-98-4	2	15430	36659	76495	66358	100830	164590	1.14742	0.129965	0.364871	2.58024	1.36751	up
mws4160	C16H12O5	Wogonin (5,7-Dihydroxy-8-methoxyflavone)	Flavonoids	Flavones	632-85-9	2	33570	63600	123980	115950	136020	246040	1.14702	0.140301	0.376464	2.25191	1.17115	up
mws0129	C16H12O5	Genkwanin (Apigenin 7-methyl ether)	Flavonoids	Flavones	437-64-9	2	18769	32631	66209	59031	73630	135560	1.1442	0.156072	0.395214	2.28062	1.18942	up
mws0051	C16H12O5	Acacetin	Flavonoids	Flavones	480-44-4	2	15351	40799	72951	60869	81457	126880	1.05971	0.144507	0.381762	2.08524	1.06021	up
pme3250	C16H12O5	Biochanin A	Flavonoids	Isoflavones	491-80-5	1	28637	59556	109520	110600	114560	216020	1.14272	0.133362	0.367331	2.23142	1.15796	up
Hmyp008708	C16H12O5	Izalpinin	Flavonoids	Flavonols	480-14-8	3	8325.5	17759	37131	28134	41992	76552	1.07608	0.187736	0.42279	2.32029	1.2143	up
mws0918	C16H12O5	Prunetin (5,4'-Dihydroxy-7-methoxyisoflavone)	Flavonoids	Isoflavones	552-59-0	1	75337	170410	347440	315910	446530	731460	1.16042	0.120924	0.360152	2.51843	1.33252	up
mws0668	C10H12N4O6	Xanthosine	Nucleotides and derivatives	Nucleotides and derivatives	146-80-5	1	774690	973300	750070	2204300	2082400	1999800	1.56654	0.000197857	0.0854577	2.51655	1.33145	up
pma1751	C12H15NO7	N-(beta-D-Glucosyl)nicotinate	Others	Vitamin	-	3	213510	278630	177420	612860	998740	727180	1.51928	0.0330113	0.282026	3.49301	1.80447	up
Zmdn001564	C14H18N2O5	γ-Glutamylphenylalanine	Amino acids and derivatives	Amino acids and derivatives	7432-24-8	1	91528	81814	125720	259540	530970	422170	1.50515	0.0573102	0.292031	4.05495	2.01968	up
Lmbn005443	C18H30O3	13-KODE; (9Z,11E)-13-Oxooctadeca-9,11-dienoic acid	Lipids	Free fatty acids	54739-30-9	3	60025	64790	111370	133220	202060	144530	1.36142	0.0424995	0.285325	2.0315	1.02255	up
Hmqp005411	C18H32O3	9-Oxo-12Z-Octadecenoic acid	Lipids	Free fatty acids	112543-32-5	2	42390	49107	85508	233440	114940	104740	1.3109	0.145815	0.383486	2.55993	1.3561	up
Hmqp005455	C18H32O3	15(R)-Hydroxylinoleic Acid	Lipids	Free fatty acids	177931-23-6	2	39574	47583	71239	250350	115460	97820	1.34272	0.164762	0.399786	2.92703	1.54944	up
Lmdp005525	C17H14O5	Afrormosin (6,4'-Dimethoxy-7-Hydroxyisoflavone)	Flavonoids	Isoflavones	550-79-8	1	1973200	4581400	12328000	8406700	13831000	15962000	1.03709	0.175624	0.410083	2.02301	1.0165	up
Lmsn003588	C17H14O5	Pterocarpine	Flavonoids	Isoflavones	524-97-0	1	1076400	2439300	5066200	3162000	7200700	9629000	1.03517	0.175742	0.410083	2.32952	1.22003	up
Zmdp001857	C14H18N2O6	γ-Glutamyltyrosine	Amino acids and derivatives	Amino acids and derivatives	7432-23-7	2	206320	143540	166310	739290	1118200	958140	1.56647	0.0177087	0.266601	5.45485	2.44754	up
Lmbn005287	C18H32O4	7S,8S-DiHODE; (9Z,12Z)-(7S,8S)-Dihydroxyoctadeca-9,12-dienoic acid	Lipids	Free fatty acids	143288-65-7	3	11376	17255	16921	40478	60623	32777	1.47596	0.0645006	0.30009	2.93901	1.55533	up
pmn001689	C18H32O4	9-Hydroxy-12-oxo-15(Z)-octadecenoic acid	Lipids	Free fatty acids	-	2	33490	30264	49812	58171	143040	70103	1.27579	0.180874	0.414543	2.38904	1.25643	up
pmf0397	C20H40O2	Arachidic acid	Lipids	Free fatty acids	506-30-9	3	6200.6	10165	13615	32728	10536	19578	1.05122	0.225458	0.454538	2.09609	1.0677	up
pmb0751	C16H16O7	Trans-5-O-(p-Coumaroyl)shikimate	Phenolic acids	Phenolic acids	-	3	13076000	15249000	21252000	7577000	3671600	5042700	1.4489	0.0290381	0.276246	0.328606	-1.60557	down
pmb3075	C16H16O7	3-O-p-Coumaroylshikimic acid	Phenolic acids	Phenolic acids	-	3	1923700	2091100	2623100	1076800	618950	828630	1.48798	0.00865855	0.266601	0.380298	-1.3948	down
pme2074	C18H29NO4	(-)-Jasmonoyl-L-Isoleucine	Amino acids and derivatives	Amino acids and derivatives	120330-93-0	3	913670	984820	1109700	153510	482930	395140	1.3642	0.00848106	0.266601	0.342924	-1.54404	down
Smcp000882	C15H21NO7	N-benzoyl-2-aminoethyl-β-D-glucopyranoside	Others	Others	-	3	33907	36127	43604	70740	91175	74987	1.53777	0.0108999	0.266601	2.08471	1.05985	up
pmp000350	C20H16O5	Glabrone	Flavonoids	Isoflavones	60008-02-8	2	13987	139820	346790	370170	652610	991480	1.13046	0.0878423	0.339925	4.02372	2.00853	up
pmn001421	C16H18O8	3-O-p-Coumaroylquinic acid*	Phenolic acids	Phenolic acids	87099-71-6	3	77268	96864	141270	74175	34542	34029	1.26214	0.0748785	0.316506	0.452584	-1.14374	down
pmb3074	C16H18O8	5-O-p-Coumaroylquinic acid	Phenolic acids	Phenolic acids	1899-30-5	2	319050	387840	366980	245300	130900	144990	1.40234	0.0188754	0.268413	0.485338	-1.04294	down
pmp001223	C20H18O5	Psoralenol	Flavonoids	Isoflavones	70522-30-4	3	35637	161870	384670	719280	1405500	1910000	1.33753	0.0691296	0.305114	6.9305	2.79296	up
pme3311	C6H14O12P2	D-Fructose-1,6-biphosphate	Others	Saccharides and Alcohols	488-69-7	3	17714	29153	14659	13547	5197.1	11182	1.16844	0.12452	0.363956	0.486398	-1.03979	down
mws1015	C15H16O9	Esculin (6,7-DihydroxyCoumarin-6-glucoside)	Lignans and Coumarins	Coumarins	531-75-9	2	25975	30062	46564	279140	425940	313630	1.57319	0.0187639	0.268413	9.92885	3.31163	up
Cmyn001328	C15H16O9	Daphnin	Lignans and Coumarins	Coumarins	486-55-5	3	43033	36565	55593	304930	332850	330940	1.58603	5.50822e-05	0.0605354	7.16557	2.84108	up
MWS1983	C12H24O11	Maltitol	Others	Saccharides and Alcohols	585-88-6	3	373700	341370	354410	722240	1565000	673800	1.38606	0.161018	0.398252	2.76867	1.46919	up
pmb1562	C21H34O4	1-Stearidonoyl-Glycerol	Lipids	Glycerol ester	-	1	49175	35903	103700	149070	138510	122960	1.3073	0.0568145	0.292031	2.17472	1.12083	up
pmp000355	C20H18O6	Licoflavonol	Flavonoids	Flavonols	60197-60-6	3	8154.3	24404	104940	102930	118090	208660	1.16473	0.0947589	0.343785	3.12498	1.64385	up
pmp000638	C20H18O6	8-Prenylkaempferol	Flavonoids	Flavones	28610-31-3	2	8373.5	21439	85741	91041	127280	187560	1.22651	0.0603445	0.297276	3.51249	1.8125	up
MWSHY0139	C20H18O6	Licoisoflavone A	Flavonoids	Other Flavonoids	66056-19-7	3	8033.4	23703	104530	100660	120760	202190	1.16578	0.0904633	0.341588	3.10869	1.63631	up
pmp000357	C20H18O6	Licoisoflavanone	Flavonoids	Other Flavonoids	66067-26-3	2	9136.7	20868	97670	114440	128470	211000	1.23515	0.0570984	0.292031	3.55521	1.82993	up
pmp000358	C21H22O5	Licoagrochalcone D	Flavonoids	Chalcones	325144-69-2	3	11472	25949	102580	115460	142660	208130	1.23641	0.0510237	0.285325	3.33033	1.73567	up
pmp000364	C21H20O6	Glycycoumarin	Lignans and Coumarins	Coumarins	94805-82-0	2	7603.3	38595	86034	78683	88801	148610	1.0393	0.124264	0.363956	2.39044	1.25728	up
pmn001695	C16H20O10	Trihydroxycinnamoylquinic acid	Phenolic acids	Phenolic acids	-	2	72625	172780	186160	300250	305910	318270	1.30651	0.041785	0.285325	2.14204	1.09899	up
Lmbp003668	C20H18O10	Kaempferol-3-O-arabinoside (Juglanin)	Flavonoids	Flavonols	5041-67-8	3	1319600	882150	1329000	592630	227710	321010	1.41042	0.0146161	0.266601	0.32326	-1.62923	down
pme3504	C22H22O9	Formononetin-7-O-glycoside (Ononin)	Flavonoids	Isoflavones	486-62-4	1	2563100	5652100	7867600	8900700	13320000	10727000	1.2145	0.0502476	0.285325	2.04863	1.03466	up
MWSHY0179	C22H22O9	Ononin	Flavonoids	Isoflavones	486-62-4	2	475280	981500	1746500	5515700	2266400	2146800	1.24332	0.170308	0.40429	3.0996	1.63208	up
Lmfn004093	C21H24O10	Phloretin-4'-O-glucoside (Trilobatin)*	Flavonoids	Chalcones	4192-90-9	1	513740	545670	672700	478630	168290	179910	1.22849	0.0787061	0.322412	0.477354	-1.06687	down
pmb0862	C20H42NO7P	LysoPC 12:0	Lipids	LPC	20559-18-6	3	8230.1	5746.8	5886	108990	77886	21200	1.44635	0.134567	0.368802	10.4756	3.38896	up
mws0355	C22H18O10	Catechin gallate	Flavonoids	Flavanols	130405-40-2	2	20451	58439	33127	14861	17864	8211.2	1.24314	0.161258	0.398252	0.365446	-1.45227	down
Lmyp006086	C22H22O10	Prunetin-5-O-glucoside*	Flavonoids	Isoflavones	-	3	563960	579140	759720	1876600	2303500	2470200	1.56724	0.00674906	0.266601	3.49497	1.80528	up
HJN091	C22H22O10	Prunetin-4'-O-glucoside*	Flavonoids	Isoflavones	154-36-9	3	17047	9650.1	15651	35247	46196	54614	1.49617	0.0191957	0.268413	3.21282	1.68384	up
pmp000575	C22H22O10	Acacetin-7-O-glucoside (Tilianin)	Flavonoids	Flavones	4291-60-5	3	508360	535280	685150	1688400	2043700	2207000	1.56832	0.00630382	0.266601	3.43541	1.78048	up
pmp000573	C22H22O10	Acacetin-7-O-galactoside	Flavonoids	Flavones	-	3	578620	621280	852670	1898500	2457500	2644500	1.55057	0.010209	0.266601	3.4106	1.77003	up
pmp000415	C22H22O10	3'-Methoxydaidzin	Flavonoids	Isoflavones	200127-80-6	2	510630	565390	716920	1622500	2132800	2359800	1.55205	0.01633	0.266601	3.41066	1.77005	up
pme3400	C22H22O10	Biochanin A-7-O-glucoside (Sissotrin)	Flavonoids	Isoflavones	5928-26-7	3	437550	506310	670260	1592700	1970300	2127500	1.55553	0.00597519	0.266601	3.52545	1.81781	up
MWS20150	C21H20O11	Luteolin-7-O-β-D-glucopyranoside	Flavonoids	Flavones	-	3	4414300	4646800	4828000	2127900	1101500	1500400	1.50651	0.00420117	0.266601	0.34054	-1.5541	down
mws2209	C21H20O11	Kaempferol-3-O-glucoside (Astragalin)	Flavonoids	Flavonols	480-10-4	1	1257900	1398800	1712800	798860	370230	398670	1.42873	0.00841503	0.266601	0.358796	-1.47876	down
Xmyp005654	C21H20O11	Kaempferol-4'-O-glucoside	Flavonoids	Flavonols	-	1	4276300	3729800	4512000	3001800	1167000	1424400	1.32681	0.0417059	0.285325	0.446809	-1.16227	down
mws0913	C21H20O11	Kaempferol-3-O-galactoside (Trifolin)	Flavonoids	Flavonols	23627-87-4	1	4200600	3320500	3346100	2284300	1011900	1318100	1.39621	0.0143602	0.266601	0.424608	-1.2358	down
mws0089	C21H20O11	Kaempferol-7-O-glucoside	Flavonoids	Flavonols	16290-07-6	1	3692300	3142800	3252100	1620200	876930	852840	1.49144	0.00297732	0.266601	0.332101	-1.59031	down
Hmpp003270	C21H20O11	Luteolin-4'-O-glucoside	Flavonoids	Flavones	6920-38-3	3	1275100	1460500	1458500	684710	465400	397400	1.51065	0.00178234	0.266601	0.368973	-1.43841	down
Lmdn006811	C30H48O3	Soyasapogenol E	Terpenoids	Triterpene	6750-59-0	3	9	9	7898.7	9912.9	6444.2	9387.4	1.15636	0.139431	0.376464	3.25192	1.70129	up
pmn001700	C30H48O3	24,30-Dihydroxy-12(13)-enolupinol	Terpenoids	Triterpene	-	2	4712.1	5552.2	37181	45193	24354	29310	1.05571	0.25457	0.476615	2.0836	1.05908	up
HJN110	C30H48O3	Betulinic acid	Terpenoids	Triterpene	472-15-1	3	1146.3	1237.3	5164.8	12090	6850.9	8615.8	1.33802	0.0313687	0.282026	3.65067	1.86816	up
pmb0464	C16H27NO14	L-Aspartic acid-O-diglucoside	Amino acids and derivatives	Amino acids and derivatives	-	3	3590600	2216400	1311800	3270800	6423000	7670100	1.19427	0.103506	0.349169	2.43916	1.28639	up
mws0034	C22H18O11	Epigallocatechin-3-gallate*	Flavonoids	Flavanols	989-51-5	3	29353	106660	26533	13405	18849	26934	1.04747	0.319079	0.525293	0.364131	-1.45747	down
mad2085	C22H18O11	Caffeoyl-p-coumaroyltartaric acid	Phenolic acids	Phenolic acids	-	2	148780	140600	144240	291830	376220	254470	1.52644	0.044975	0.285325	2.12748	1.08915	up
Hmmp004965	C22H22O11	Diosmetin-7-O-Beta-D-Glucopyranoside	Flavonoids	Flavanones	20126-59-4	3	191630	369360	555990	957650	1109800	1250800	1.41131	0.0063222	0.266601	2.97073	1.57082	up
Lmdp004307	C23H26O10	Farrerol-7-O-glucoside	Flavonoids	Flavanones	885044-12-2	3	29127	73879	77946	109420	143380	119100	1.24579	0.0342182	0.282026	2.05524	1.03931	up
Hmdn001667	C20H16O13	ellagic acid-4-O-glucoside	Tannins	Tannin	-	3	103350	120750	136540	60943	25750	32474	1.44344	0.00527285	0.266601	0.330432	-1.59757	down
Hmcn001884	C21H20O12	6-HydroxyLuteolin 5-glucoside	Flavonoids	Flavones	-	3	47524	84201	33271	109820	223000	63576	1.06837	0.240107	0.464574	2.40246	1.26451	up
Zmhn002508	C21H28O12	4-p-Cumaroyl-rhamnosyl-(1→6)-D-glucose	Phenolic acids	Phenolic acids	-	2	136640	169740	172480	298050	416620	278480	1.48581	0.0497682	0.285325	2.07399	1.05241	up
Hmcp002207	C22H22O12	Isorhamnetin-7-O-glucoside (Brassicin)	Flavonoids	Flavonols	6743-96-0	3	96410	42738	46307	42766	19514	10597	1.16179	0.150845	0.389475	0.392963	-1.34753	down
HJAP005	C22H22O13	Laricitrin-3-O-glucoside	Flavonoids	Flavonols	39986-90-8	2	33738	39814	33047	66712	91767	65156	1.50958	0.0388165	0.285325	2.09791	1.06895	up
Lmhn003799	C24H22O12	Feruloylferuloyltartaric acid	Phenolic acids	Phenolic acids	-	3	57921	45482	51077	143890	129520	97151	1.52534	0.0284531	0.276246	2.39876	1.26229	up
pmb3045	C23H22O13	tricin-7-O-Glucuronide	Flavonoids	Flavones	-	3	35182	49272	86150	95083	147330	141390	1.32731	0.0342935	0.282026	2.24967	1.16971	up
Zmdp004112	C24H22O13	Genistein-7-O-(6''-malonyl)glucoside	Flavonoids	Isoflavones	-	1	705220	1402600	2907600	2931700	4087300	3013500	1.14717	0.10651	0.350463	2.00033	1.00024	up
pmp000195	C25H24O13	6''-O-Malonylglycitin	Flavonoids	Isoflavones	137705-39-6	1	746190	3703700	11136000	13576000	11318000	9958600	1.03615	0.163763	0.399786	2.23616	1.16103	up
Zmhp006502	C25H24O14	Kaempferide-3-O-(6''-malonyl)glucoside	Flavonoids	Flavonols	-	3	40789	75574	84339	175890	290390	274400	1.47827	0.0259639	0.276246	3.69045	1.8838	up
pma0795	C24H22O15	Tricetin-5-O-(6''-malonyl)glucoside	Flavonoids	Flavones	-	3	196440	85669	191340	310530	352690	722340	1.29983	0.137493	0.374951	2.92652	1.54919	up
pmd0143	C28H58NO7P	LysoPC 20:0	Lipids	LPC	108341-80-6	3	10375	15016	9172.2	16342	48546	30881	1.27842	0.155556	0.394818	2.77084	1.47032	up
Lmmn002260	C27H36O12	5'-Methoxyisolariciresinol-9'-O-glucoside	Lignans and Coumarins	Lignans	-	2	401450	291550	394570	219120	149580	132890	1.43957	0.0138449	0.266601	0.461202	-1.11653	down
Lmhp003658	C27H28O14	Monohydroxy-trimethoxyflavone-O-(6''-malonyl)glucoside	Flavonoids	Flavones	-	3	110160	247250	217750	728660	1188000	732010	1.49509	0.0376127	0.285325	4.6051	2.20323	up
Lmxp010913	C35H66NO9P	1-(9Z-Octadecenoyl)-2-(9-oxo-nonanoyl)-sn-glycero-3-phosphocholine	Lipids	Glycerol ester	-	1	225600	257370	454610	214580	62076	80218	1.22461	0.0978943	0.34913	0.380633	-1.39353	down
Zmhp003322	C36H36O17	Isovitexin-2''-O-(6'''-p-coumaroyl)glucoside	Flavonoids	Flavonoid carbonoside	-	2	9	9	9	801110	324950	266100	1.59309	0.111408	0.35183	51561.5	15.654	up
Lmmn004491	C48H76O21	Medicagenic acid-3-O-glucosyl-(1,6)-glucosyl-(1,3)-glucoside	Terpenoids	Triterpene Saponin	37838-43-0	3	61323	63873	76620	44059	9	9	1.1607	0.0584593	0.292031	0.218402	-2.19494	down
